# Supplementary material
Source: PubMed Central journal article supplement (PMC4824613)
Supplement: supp_pp.15.01944_PP2015-01944DR1_Supplemental_Material_2.pdf [file supp_pp.15.01944_PP2015-01944DR1_Supplemental_Material_2.pdf]

**Supplemental Table S1.** Identified compounds with statistical significance and their variation tendency for each of the comparisons. RMT (relative migration time *versus* IS). % change ([average concentration in the case group-average concentration in the WT group] \*100/ average concentration in the WT group).

| Compound             | Formula       | Mass     | RMT  | KD Pap1 1130 vs WT |          | KD Icy2 1399 vs WT |          | OE Pap1 937 vs WT |          |
|----------------------|---------------|----------|------|--------------------|----------|--------------------|----------|-------------------|----------|
|                      |               |          |      | % Change           | p-Value  | % Change           | p-Value  | % Change          | p-Value  |
| Alanine              | C3 H7 N O2    | 89.0477  | 0.67 | -84.4              | 5.42E-04 | -73.0              | 1.05E-03 |                   |          |
| Sarcosine            | C3 H7 N O2    | 89.0477  | 0.79 | -77.0              | 1.39E-03 | -36.4              | 1.64E-02 |                   |          |
| Serine               | C3 H7 N O3    | 105.0426 | 0.86 | -86.4              | 1.55E-03 | -73.2              | 3.03E-03 | 134.5             | 9.22E-03 |
| Proline              | C5 H9 N O2    | 115.0633 | 0.92 |                    |          | 144.3              | 4.31E-02 | 810.2             | 3.21E-07 |
| Valine               | C5 H11 N O2   | 117.0790 | 0.86 | -80.8              | 4.67E-04 | -65.2              | 1.22E-03 |                   |          |
| Betaine              | C5 H11 N O2   | 117.0790 | 0.96 | -77.7              | 6.65E-06 | -36.7              | 2.36E-04 | -66.2             | 1.47E-05 |
| Leucine + Isoleucine | C6 H13 N O2   | 131.0946 | 0.88 | -84.5              | 3.30E-04 | -72.0              | 6.82E-04 |                   |          |
| Asparagine           | C4 H8 N2 O3   | 132.0535 | 0.90 | -59.0              | 1.20E-03 | -34.7              | 9.44E-03 |                   |          |
| Aspartic acid        | C4 H7 N O4    | 133.0375 | 0.97 | -83.3              | 1.85E-04 | -84.1              | 1.74E-04 |                   |          |
| Glutamine            | C5 H10 N2 O3  | 146.0692 | 0.92 | -89.6              | 1.94E-02 |                    |          | 1758.9            | 6.43E-04 |
| Lysine               | C6 H14 N2 O2  | 146.1055 | 0.63 | -88.7              | 5.09E-04 | -76.5              | 9.88E-04 |                   |          |
| Glutamic acid        | C5 H9 N O4    | 147.0532 | 0.93 | -82.2              | 8.85E-04 | -66.5              | 2.10E-03 | -37.3             | 1.39E-02 |
| Methionine           | C5 H11 N O2 S | 149.0514 | 0.91 | -91.0              | 5.25E-04 | -83.8              | 7.44E-04 |                   |          |
| Histidine            | C6 H9 N3 O2   | 155.0695 | 0.67 | -92.6              | 3.87E-03 | -91.4              | 4.07E-03 | 23.2              | 6.84E-01 |
| Phenylalanine        | C9 H11 N O2   | 165.0795 | 0.94 | -86.1              | 1.30E-04 | -78.4              | 2.06E-04 | 175.2             | 1.29E-02 |
| Arginine             | C6 H14 N4 O2  | 174.1117 | 0.65 | -80.4              | 6.49E-04 | -61.8              | 1.91E-03 |                   |          |
| Tyrosine             | C9 H11 N O3   | 181.0739 | 0.96 | -84.9              | 3.80E-04 | -77.6              | 5.79E-04 |                   |          |
| Tryptophan           | C11 H12 N2 O2 | 204.0899 | 0.94 | -96.3              | 4.35E-05 | -95.6              | 4.54E-05 | -79.5             | 9.16E-05 |

**Supplemental Table S2.** Primer sequences used for RT-qPCR amplification to analyse the copy number in transgenic barley plants. *HvCycl* gene (cyclophilin), *Hv4Hppd* gene (4-hydroxyphenyl-pyruvate dioxygenase), *HvPap-1* gene (cathepsin F-like protease), *Hvlcy-2* gene (cystatin) and *miR* (Osa-MIR528 miRNA gene).

| Barley genes   | Primers                                                                                                             |
|----------------|---------------------------------------------------------------------------------------------------------------------|
| <i>HvCycl</i>  | forward: 5'-CCTGTCGTGTCGTCCGGTCTAAA-3'<br>reverse: 5'-ACGCAGATCCAGCAGCCTAAAG-3'                                     |
| <i>Hv4Hppd</i> | forward: 5'-GCTCCAAATCTTCACCAAGC-3'<br>reverse: 5'-CTCTTCCCCTCTCTCGTCCT-3'                                          |
| <i>HvPap-1</i> | forward: 5'-TCCTGGAGTCGATCTTGGTTTC-3'<br>reverse: 5'-CAAGCATACTGTTGCGGCTTC-3'                                       |
| <i>Hvlcy-2</i> | forward: 5'-TCCTGGAGTCGATCTTGGTTTC-3'<br>reverse: 5'-CAAGCATACTGTTGCGGCTTC-3'                                       |
| <i>miR</i>     | forward: 5'-AGTTATGCGGCATTGATACCGGTCAGGAGATTCAGTTTGA-3'<br>reverse: 5'-AATTATGCGGCATAGATTCCGGTAGAGAGGCCAAAAGTGAA-3' |

**Supplemental Table S3.** Primer sequences used for the amplification of barley genes in RT-qPCR assays. *HvPap-4*, *HvPap-6*, *HvPap-9*, *HvPap-10* and *HvPap-17* genes (cathepsin L-like protease), *HvPap-1* and *HvPap-2* genes (cathepsin F-like protease), *HvPap-12* gene (cathepsin H-like protease) *HvPap-19* and *HvPap-20* genes (cathepsin B-like protease) and *HvCycl* (cyclophilin).

| Barley genes    | Primers                                                                        |
|-----------------|--------------------------------------------------------------------------------|
| <i>HvCycl</i>   | forward: 5'-TCCACCGGAGAGGAAGTACAGT-3'<br>reverse: 5'-AATGTGCTCAGAGATGCAAGGA-3' |
| <i>HvPap-1</i>  | forward: 5'-TCCTGGAGTCGATCTTTGGTTTC-3'<br>reverse: 5'-CAAGCATACTGTTGCGGCTTC-3' |
| <i>HvPap-2</i>  | forward: 5'-ATGGCTCGCCTCCGCCTCCGC-3'<br>reverse: 5'-CTATTCCTTCTTAGAGGTATG-3'   |
| <i>HvPap-4</i>  | forward: 5'-CCTTGAGAGTCCTTGTTCCCGA-3'<br>reverse: 5'-CCATGTTGTCGTTTTTAACCGA-3' |
| <i>HvPap-6</i>  | forward: 5'-TGCAATTGACGGCAAGAAGA-3'<br>reverse: 5'-TGGATCACCAGGTGATCATTTG-3'   |
| <i>HvPap-9</i>  | forward: 5'-ACTGCGACAACGTCAACAAC-3'<br>reverse: 5'-TCTTCTGGATGAACTGGAAGGC-3'   |
| <i>HvPap-10</i> | forward: 5'-TCGATCCATGTGCTTATCCGA-3'<br>reverse: 5'-AACACACGCCTAATCCTTGGC-3'   |
| <i>HvPap-12</i> | forward: 5'-ATGTGCGCTATTGCTACCTGC-3'<br>reverse: 5'-CACCTTATTCATGTCTGGCGAA-3'  |
| <i>HvPap-16</i> | forward: 5'-CTGGATCGGTAAGAACTCGTGG-3'<br>reverse: 5'-TGATGGAGGTGCCATCATATGA-3' |
| <i>HvPap-17</i> | forward: 5'-AGCTGCGTGTGCATTTATCATG-3'<br>reverse: 5'-GCGGTGAAATATGCAACCCA-3'   |
| <i>HvPap-19</i> | forward: 5'-CACCTTATTCATGTCTGGCGAA-3'<br>reverse: 5'-TGCCCGCTTAATTTGACAGG-3'   |
| <i>HvPap-20</i> | forward: 5'-GGAGGTCACGCTGTCAAGTT-3'<br>reverse: 5'-GTATCCGTCATCACCCCATC-3'     |
